# Supplementary material for: Reactivity of the Ni→B dative σ-bond in the nickel boratrane compounds [κ4-B(mimBut)3]NiX (X = Cl, OAc, NCS, N3): synthesis of a series of B-functionalized tris(2-mercapto-1-tert-butylimidazolyl)borato complexes, [YTmBut]NiZ
Source: Royal Society of Chemistry journal article supplement (doi:10.1039/b714466k), 2008-01-01
Supplement: b714466k.pdf [file b714466k.pdf]

## SUPPORTING INFORMATION

### Reactivity of the Ni→B Dative $\sigma$ -Bond in the Nickel Boratrane Compounds [ $\kappa^4$ -B(mim<sup>Bu<sup>t</sup></sup>)<sub>3</sub>]NiX (X = Cl, OAc, NCS, N<sub>3</sub>): Synthesis of a Series of *B*-Functionalized *Tris*(2-mercapto-1-*t*-butylimidazolyl)borato Complexes, [YTm<sup>Bu<sup>t</sup></sup>]NiZ

Keliang Pang,<sup>‡</sup> Joseph M. Tanski,<sup>§</sup> and Gerard Parkin<sup>\*‡</sup>

<sup>‡</sup> *Department of Chemistry, Columbia University,  
New York, New York 10027, USA.*

<sup>§</sup> *Department of Chemistry, Vassar College,  
124 Raymond Avenue, Box 601, Poughkeepsie, New York 12604, USA.*

*Received xxxx xx, 2007*

---

## EXPERIMENTAL SECTION

### General Considerations

All manipulations were performed using a combination of dry glovebox, high vacuum, and Schlenk techniques under a nitrogen or argon atmosphere unless otherwise specified.<sup>1</sup> Solvents were purified and degassed by standard procedures. <sup>1</sup>H NMR spectra were measured on Bruker 300 DRX and Bruker 400 DRX spectrometers. <sup>1</sup>H chemical shifts are reported in ppm relative to SiMe<sub>4</sub> ( $\delta = 0$ ) and were referenced internally with respect to the protio solvent impurity ( $\delta$  7.16 for C<sub>6</sub>D<sub>5</sub>H; 1.94 for CD<sub>2</sub>HN; 7.26 for CHCl<sub>3</sub>).<sup>2</sup> <sup>19</sup>F NMR spectra are reported in ppm relative to CFCl<sub>3</sub> ( $\delta = 0$ ) and were referenced using external PhCF<sub>3</sub> in CDCl<sub>3</sub> ( $\delta = -63.7$ ).<sup>3</sup> <sup>11</sup>B NMR spectra are reported with reference to BF<sub>3</sub>(OEt<sub>2</sub>) ( $\delta = 0.0$ ).<sup>4</sup> Coupling constants are given in hertz. Infrared spectra were recorded on Nicolet Avatar 370 DTGS spectrometer and are reported in cm<sup>-1</sup>. Mass spectra were obtained on a Micromass Quadrupole-Time-of-Flight mass spectrometer using fast atom bombardment (FAB). [Tm<sup>Bu<sup>t</sup></sup>]<sup>+</sup>K<sup>-</sup> was prepared by the literature method.<sup>5</sup>

### Synthesis of [κ<sup>4</sup>-B(mim<sup>Bu<sup>t</sup></sup>)<sub>3</sub>]<sup>+</sup>NiCl<sup>-</sup>

A solution of [Tm<sup>Bu<sup>t</sup></sup>]<sup>+</sup>K<sup>-</sup> (3.0 g, 5.8 mmol) in CH<sub>3</sub>OH (30 mL) was treated with a solution of NiCl<sub>2</sub>·6H<sub>2</sub>O (1.4 g, 5.9 mmol) in CH<sub>3</sub>OH (30 mL), resulting in a green solution with a green precipitate. The mixture was stirred for 15 minutes and then exposed to air and stirred for an additional 2 hours. The mixture was concentrated to ca. 10 mL and treated with Et<sub>2</sub>O (30 mL), thereby depositing more material. The resulting precipitate was isolated by filtration and washed with acetone/H<sub>2</sub>O (1:1, 30 mL), acetone (2 × 30 mL) and Et<sub>2</sub>O (2 × 30 mL) and dried *in vacuo*, giving [κ<sup>4</sup>-B(mim<sup>Bu<sup>t</sup></sup>)<sub>3</sub>]<sup>+</sup>NiCl<sup>-</sup> as a green powder (1.9 g, 57%). Crystals suitable for X-ray diffraction were grown by slow evaporation of an acetonitrile solution. Anal. calcd. for C<sub>21</sub>H<sub>33</sub>BClNiS<sub>3</sub>: C, 44.2%; H, 5.8%; N, 14.7%. Found: C, 44.2%; H, 5.9%; N, 14.6%. <sup>1</sup>H NMR (CD<sub>3</sub>CN): -0.15 [s, 27H, 3 Bu<sup>t</sup>], 12.95 [s, 3H, 3 CH<sub>2</sub>mim<sup>Bu<sup>t</sup></sup>], 17.64 [s, 3H, 3 CH<sub>3</sub>mim<sup>Bu<sup>t</sup></sup>]. <sup>1</sup>H NMR (CD<sub>3</sub>OD): 0.04 [s,

27H, 3 Bu<sup>t</sup>], 11.86 [s, 3H, 3 CH<sub>3</sub>mim<sup>Bu<sup>t</sup></sup>], 17.64 [s, 3H, 3 CH<sub>3</sub>mim<sup>Bu<sup>t</sup></sup>]. IR Data (KBr pellet, cm<sup>-1</sup>): 3178 (m), 3111 (m), 3070 (m), 2992 (m), 2971 (m), 2932 (w), 1561 (w), 1426 (s), 1392 (s), 1378 (s), 1369 (s), 1308 (m), 1262 (w), 1229 (w), 1189 (s), 1163 (s), 1138 (w), 1067 (m), 1028 (m), 820 (m), 803 (m), 784 (s), 735 (s), 696 (m). Mass spectrum:  $m/z = 534.4$  {M-Cl}<sup>+</sup>.

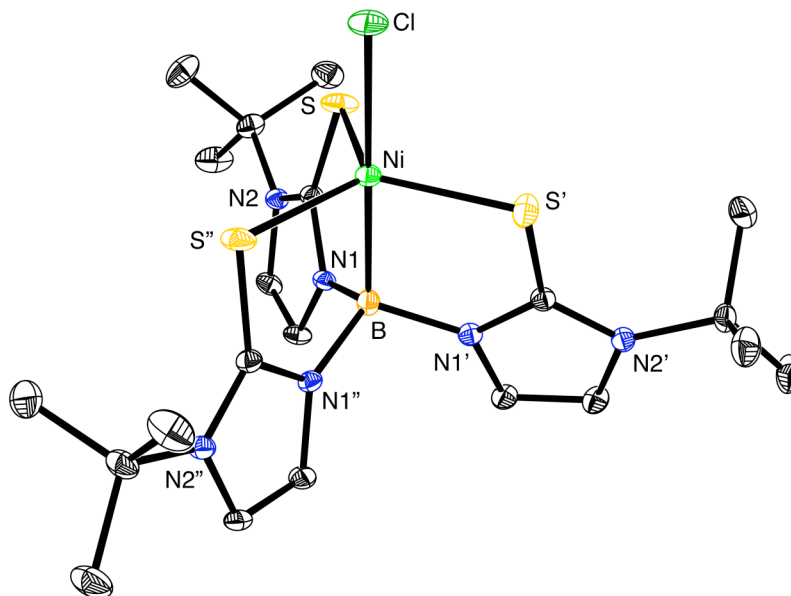

Molecular structure of  $[\kappa^4\text{-B}(\text{mim}^{\text{Bu}^t})_3]\text{NiCl}$  (20% thermal parameters)

### Synthesis of $[\kappa^4\text{-B(mim}^{\text{Bu}^t})_3]\text{NiNCS}$

A mixture of  $[\kappa^4\text{-B(mim}^{\text{Bu}^t})_3]\text{NiCl}$  (0.200 g, 0.35 mmol) and KSCN (0.034 g, 0.35 mmol) in  $\text{CH}_3\text{CN}$  (8 mL) was stirred at  $70^\circ\text{C}$  for 1 day after which period the resulting green mixture was filtered. The green precipitate was extracted into  $\text{CH}_3\text{CN}$  (20 mL) and the two filtrates were combined. The volatile components were removed *in vacuo* to give  $[\kappa^4\text{-B(mim}^{\text{Bu}^t})_3]\text{NiNCS}$  as a green solid (0.046 g, 22%). Crystals suitable for X-ray diffraction were grown by slow evaporation of an acetonitrile solution. Anal. calcd. for  $\text{C}_{22}\text{H}_{33}\text{BN}_7\text{NiS}_4$ : C, 44.5%; H, 5.6%; N, 16.5%. Found: C, 43.6%; H, 5.5%; N, 15.7%.  $^1\text{H}$  NMR ( $\text{CD}_3\text{CN}$ ): 0.01 [s, 27H, 3  $\text{Bu}^t$ ], 12.75 [s, 3H, 3  $\text{CH}_{\text{mim}^{\text{Bu}^t}}$ ], 17.31 [s, 3H, 3  $\text{CH}_{\text{mim}^{\text{Bu}^t}}$ ]. IR Data (KBr pellet,  $\text{cm}^{-1}$ ): 3166 (w), 3130 (w), 3076 (w), 2977 (m), 2935 (w), 2093 (s), 1559 (w), 1427 (m), 1393 (s), 1381 (m), 1370 (m), 1309 (w), 1231 (w), 1191 (s), 1159 (m), 1132 (w), 1067 (w), 1033 (w), 820 (w), 786 (m), 725 (m), 690 (m).

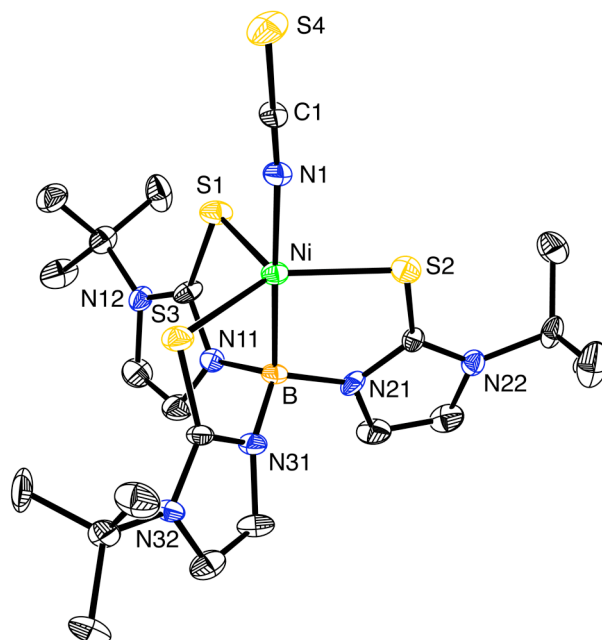

Molecular structure of  $[\kappa^4\text{-B(mim}^{\text{Bu}^t})_3]\text{NiNCS}$  (20% thermal parameters)

### Synthesis of $[\kappa^4\text{-B(mim}^{\text{Bu}^t})_3]\text{NiN}_3$

A mixture of  $[\kappa^4\text{-B(mim}^{\text{Bu}^t})_3]\text{NiCl}$  (0.200 g, 0.35 mmol) and  $\text{NaN}_3$  (0.023 g, 0.35 mmol) in  $\text{CH}_3\text{CN}$  (25 mL) was stirred at  $70^\circ\text{C}$  for 1 day. After this period, the mixture was filtered, giving a green filtrate. The volatile components were removed from the filtrate

to give  $[\kappa^4\text{-B(mim}^{\text{Bu}^t})_3]\text{NiN}_3$  as a green solid (0.055 g, 27%). Crystals of composition  $[\kappa^4\text{-B(mim}^{\text{Bu}^t})_3]\text{NiN}_3 \cdot 2\text{CH}_3\text{CN}$  suitable for X-ray diffraction were grown by slow evaporation of an acetonitrile solution. Anal. calcd. for  $\text{C}_{21}\text{H}_{33}\text{BN}_9\text{NiS}_3$ : C, 43.7%; H, 5.8%; N, 21.8%. Found: C, 41.9%; H, 5.3%; N, 20.2%.  $^1\text{H NMR}$  ( $\text{CD}_3\text{CN}$ ): -0.01 [s, 27H, 3  $\text{Bu}^t$ ], 12.64 [s, 3H, 3  $\text{CH}_{\text{mim}^{\text{Bu}^t}}$ ], 17.44 [s, 3H, 3  $\text{CH}_{\text{mim}^{\text{Bu}^t}}$ ]. IR Data (KBr pellet,  $\text{cm}^{-1}$ ): 3167 (w), 3119 (w), 3076 (w), 2976 (m), 2918 (w), 2145 (w), 2111 (w), 2038 (s), 1560 (w), 1427 (m), 1393 (s), 1370 (m), 1310 (w), 1232 (w), 1193 (s), 1162 (m), 1134 (w), 1070 (m), 1033 (w), 820 (w), 785 (m), 735 (w), 685 (w). Mass spectrum:  $m/z = 534.5 \{M\text{-N}_3\}^+$ .

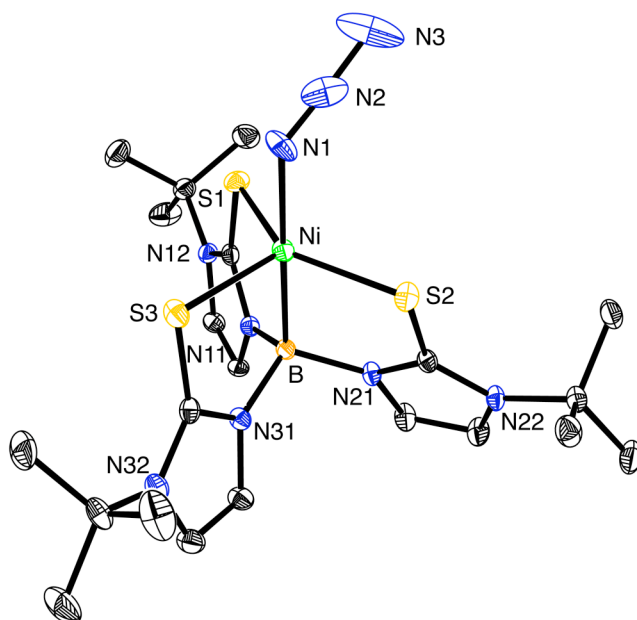

Molecular structure of  $[\kappa^4\text{-B(mim}^{\text{Bu}^t})_3]\text{NiN}_3$  (20% thermal parameters)

### Synthesis of $[\kappa^4\text{-B}(\text{mim}^{\text{Bu}^t})_3]\text{NiOAc}$

A mixture of  $[\kappa^4\text{-B}(\text{mim}^{\text{Bu}^t})_3]\text{NiCl}$  (0.200 g, 0.35 mmol) and TIOAc (0.100 g, 0.38 mmol) in  $\text{CH}_3\text{OH}$  (20 mL) was stirred at room temperature for 12 hours. After this period, the mixture was filtered to give a green filtrate. The volatile components were removed *in vacuo* from the filtrate to give a green residue, which was extracted with  $\text{CH}_2\text{Cl}_2$  (20 mL). The volatile components were removed *in vacuo* from the  $\text{CH}_2\text{Cl}_2$  extract to give  $[\kappa^4\text{-B}(\text{mim}^{\text{Bu}^t})_3]\text{NiOAc}$  as a green powder (0.019 g, 9%). Crystals of composition  $[\kappa^4\text{-B}(\text{mim}^{\text{Bu}^t})_3]\text{NiOAc}\cdot\text{CH}_3\text{CN}$  suitable for X-ray diffraction were grown by slow evaporation of an acetonitrile/methanol (10:1) solution.  $^1\text{H NMR}$  ( $\text{CDCl}_3$ ): -0.03 [s, 27H, 3 Bu<sup>t</sup>], 12.56 [s, 3H], 16.1 [s, br, 3H], 17.8 [s, 3H].

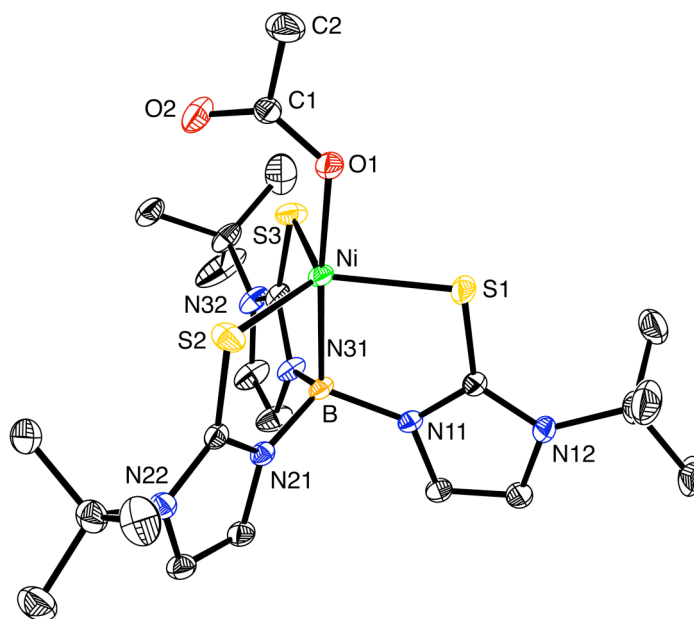

Molecular structure of  $[\kappa^4\text{-B}(\text{mim}^{\text{Bu}^t})_3]\text{NiOAc}$  (40% thermal parameters)

## Synthesis of [FTm<sup>Bu<sup>t</sup></sup>]NiCl

A suspension of [ $\kappa^4$ -B(mim<sup>Bu<sup>t</sup></sup>)<sub>3</sub>]NiCl (0.100 g, 0.18 mmol) in benzene (3 mL) in an ampoule was treated with a solution of XeF<sub>2</sub> (0.040 g, 0.24 mmol) in benzene (7 mL). The resulting mixture was stirred for 12 hours at 100°C and then filtered. The volatile components were removed from the filtrate by lyophilization to give [FTm<sup>Bu<sup>t</sup></sup>]NiCl as green powder, which was washed with pentane (2 × 10 mL) and dried *in vacuo* (0.056 g, 54%). Crystals of composition [FTm<sup>Bu<sup>t</sup></sup>]NiCl·C<sub>6</sub>H<sub>6</sub> suitable for X-ray diffraction were grown by slow evaporation of a benzene solution. Anal. calcd. for C<sub>21</sub>H<sub>33</sub>BClFN<sub>6</sub>NiS<sub>3</sub>·(C<sub>6</sub>H<sub>6</sub>)<sub>0.2</sub>: C, 44.0%; H, 5.7%; N, 13.9%. Found: C, 44.0%; H, 5.7%; N, 12.7%. <sup>1</sup>H NMR (C<sub>6</sub>D<sub>6</sub>): -7.64 [s, 3H, 3 CH<sub>2</sub>mim<sup>Bu<sup>t</sup></sup>], 5.66 [s, 27H, 3 Bu<sup>t</sup>], 9.60 [s, 3H, 3 CH<sub>2</sub>mim<sup>Bu<sup>t</sup></sup>]. <sup>11</sup>B NMR (C<sub>6</sub>D<sub>6</sub>): -64.0 [d, J<sub>B-F</sub> = 36 Hz]. <sup>19</sup>F NMR (C<sub>6</sub>D<sub>6</sub>): -140 ~ -200 [br]. Mass spectrum: *m/z* = 553.2 {M-Cl}<sup>+</sup>, 569.1 {M-F}<sup>+</sup>, 588.1 {M}<sup>+</sup>.

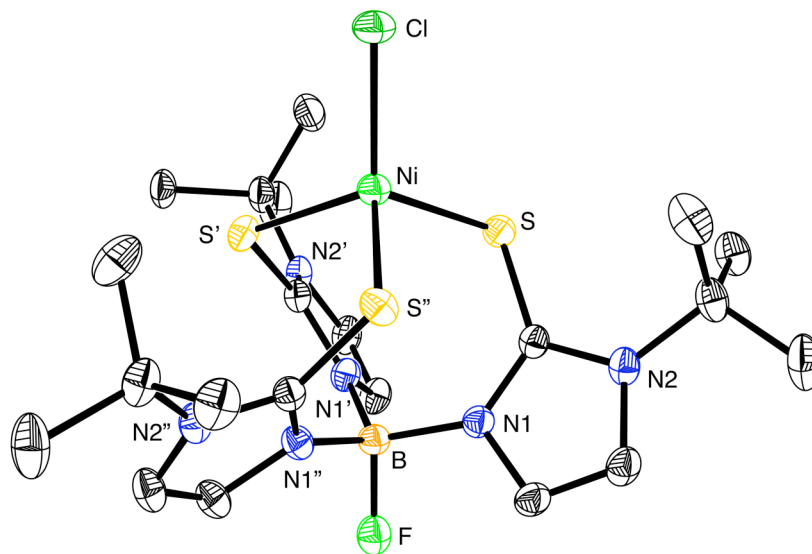

Molecular structure of [FTm<sup>Bu<sup>t</sup></sup>]NiCl (40% thermal parameters)

## Synthesis of [ClTm<sup>Bu<sup>t</sup></sup>]NiCl

A mixture of [ $\kappa^4$ -B(mim<sup>Bu<sup>t</sup></sup>)<sub>3</sub>]NiCl (0.100 g, 0.18 mmol) and CHCl<sub>3</sub> (0.10 mL, 1.2 mmol) in toluene (10 mL) was stirred in a glass ampoule at 120°C for 10 hours. After this period, the volatile components were removed *in vacuo* and the residue obtained was extracted into benzene (20 mL). The volatile components were removed from the extract by lyophilization to give [ClTm<sup>Bu<sup>t</sup></sup>]NiCl as green powder (0.040 g, 37%). Crystals of

composition  $[\text{ClTm}^{\text{Bu}^t}]\text{NiCl} \cdot \text{C}_6\text{H}_6$  suitable for X-ray diffraction were grown by slow evaporation of a benzene solution. Anal. calcd. for  $\text{C}_{21}\text{H}_{33}\text{BCl}_2\text{N}_6\text{NiS}_3 \cdot (\text{C}_6\text{H}_6)_{0.8}$ : C, 46.3%; H, 5.7%; N, 12.6%. Found: C, 46.3%; H, 6.7%; N, 11.7%.  $^1\text{H}$  NMR ( $\text{C}_6\text{D}_6$ ): -8.91 [s, 3H, 3  $\text{CH}_{\text{mim}}^{\text{Bu}^t}$ ], 5.93 [s, 27H, 3  $\text{Bu}^t$ ], 8.02 [s, 3H, 3  $\text{CH}_{\text{mim}}^{\text{Bu}^t}$ ]. IR Data (KBr pellet,  $\text{cm}^{-1}$ ): 3185 (w), 3156 (w), 2981 (m), 2921 (w), 1409 (m), 1368 (m), 1355 (s), 1294 (w), 1232 (w), 1186 (s), 1170 (s), 1075 (m), 1030 (w), 821 (w), 797 (m), 770 (m), 744 (w), 731 (w), 685 (w), 497 (m), 483 (m), 473 (m). Mass spectrum:  $m/z = 568.8$   $\{\text{M}-\text{Cl}\}^+$ ,  $605.7$   $\{\text{M}\}^+$ .

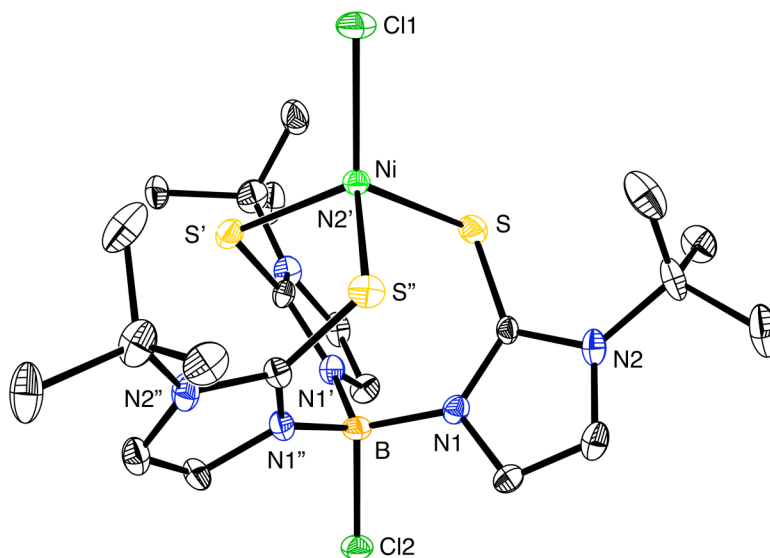

Molecular structure of  $[\text{ClTm}^{\text{Bu}^t}]\text{NiCl}$  (40% thermal parameters)

### Synthesis of $[\text{ClTm}^{\text{Bu}^t}]\text{NiBr}$

A mixture of  $[\kappa^4\text{-B}(\text{mim}^{\text{Bu}^t})_3]\text{NiCl}$  (0.040 g, 0.07 mmol) and  $\text{CHBr}_3$  (6  $\mu\text{L}$ , 0.07 mmol) in benzene- $d_6$  (0.7 mL) was placed in a J-Young NMR tube and heated at  $120^\circ\text{C}$  for 2 days. The resulting mixture was filtered and the volatile components were removed from the filtrate by lyophilization to give  $[\text{ClTm}^{\text{Bu}^t}]\text{NiBr}$  as green powder (0.005 g, 10%). Crystals of composition  $[\text{ClTm}^{\text{Bu}^t}]\text{NiBr} \cdot \text{C}_6\text{H}_6$  suitable for X-ray diffraction were grown by slow evaporation of a benzene solution. Anal. calcd. for  $\text{C}_{21}\text{H}_{33}\text{BBrClN}_6\text{NiS}_3 \cdot (\text{C}_6\text{H}_6)_{0.5}$ : C, 41.8%; H, 5.2%; N, 12.2%. Found: C, 41.4%; H, 5.5%; N, 11.2%.  $^1\text{H}$  NMR ( $\text{C}_6\text{D}_6$ ): -7.27 [s, 3H, 3  $\text{CH}_{\text{mim}}^{\text{Bu}^t}$ ], 4.08 [s, 27H, 3  $\text{Bu}^t$ ], 8.65 [s, 3H, 3  $\text{CH}_{\text{mim}}^{\text{Bu}^t}$ ]. IR Data (KBr pellet,  $\text{cm}^{-1}$ ): 3187 (w), 3160 (w), 2971 (m), 2928 (w), 1410 (w), 1356 (s), 1295 (w), 1188 (s), 1170 (s),



1077 (m), 820 (w), 798 (m), 768 (m), 732 (w), 685 (w), 669 (w), 481 (m), 474 (m). Mass spectrum:  $m/z = 569.0$   $\{M-Br\}^+$ ,  $650.0$   $\{M\}^+$ .

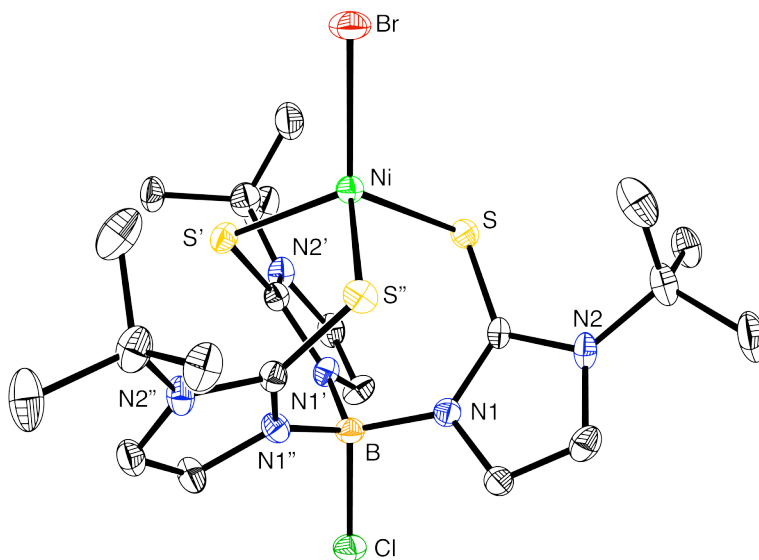

Molecular structure of [CITm<sup>Bu<sup>t</sup></sup>]NiBr (20% thermal parameters)

### Synthesis of [ClTm<sup>Bu<sup>t</sup></sup>]NiI

A suspension of [ $\kappa^4$ -B(mim<sup>Bu<sup>t</sup></sup>)<sub>3</sub>]NiCl (0.140 g, 0.25 mmol) in benzene (5 mL) was treated with a solution of I<sub>2</sub> (0.031 g, 0.12 mmol) in benzene (5 mL). The mixture was stirred for 30 minutes and then filtered. The volatile components were removed from the filtrate by lyophilization to give [ClTm<sup>Bu<sup>t</sup></sup>]NiI as an orange powder, which was washed with Et<sub>2</sub>O (10 mL) and dried *in vacuo* (0.055 g, 33%). Crystals suitable for X-ray diffraction were grown by slow evaporation of a benzene solution. Anal. calcd. for C<sub>21</sub>H<sub>33</sub>BClIN<sub>6</sub>NiS<sub>3</sub>: C, 36.2%; H, 4.8%; N, 12.1%. Found: C, 35.7%; H, 4.6%; N, 11.1%. <sup>1</sup>H NMR (C<sub>6</sub>D<sub>6</sub>): -4.76 [s, 3H, 3 CH<sub>2</sub>mim<sup>Bu<sup>t</sup></sup>], 1.50 [s, 27H, 3 Bu<sup>t</sup>], 9.46 [s, 3H, 3 CH<sub>2</sub>mim<sup>Bu<sup>t</sup></sup>]. IR Data (KBr pellet, cm<sup>-1</sup>): 3192 (w), 3182 (w), 3155 (w), 2976 (m), 2920 (m), 1571 (m), 1481 (w), 1410 (m), 1371 (m), 1355 (s), 1297 (m), 1229 (w), 1187 (s), 1169 (s), 1076 (m), 1031 (w), 980 (w), 821 (m), 796 (m), 768 (m), 731 (m), 727 (m), 684 (m). Mass spectrum: *m/z* = 569.1 {M-I}<sup>+</sup>, 696.0 {M}<sup>+</sup>.

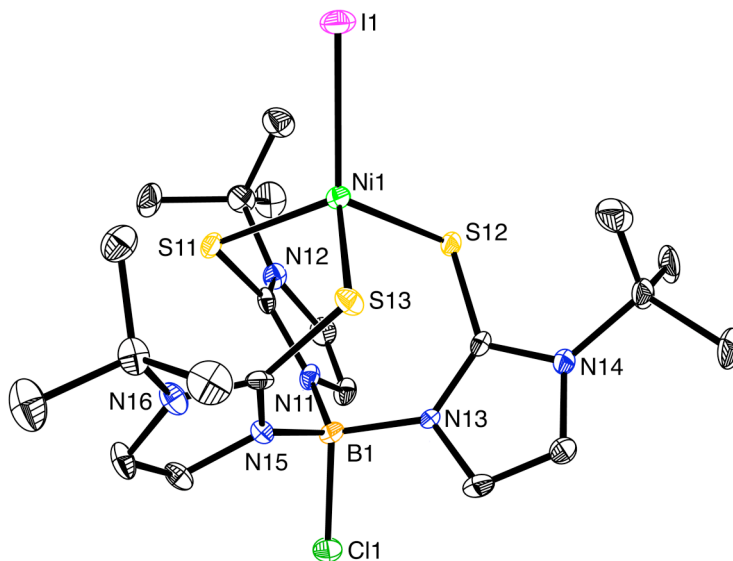

Molecular structure of [ClTm<sup>Bu<sup>t</sup></sup>]NiI (20% thermal parameters)

### Synthesis of [SCNTm<sup>Bu<sup>t</sup></sup>]NiI

A suspension of [ $\kappa^4$ -B(mim<sup>Bu<sup>t</sup></sup>)<sub>3</sub>]NiNCS (0.040 g, 0.067 mmol) in benzene (0.5 mL) was treated with a solution of I<sub>2</sub> (0.009 g, 0.035 mmol) in benzene (1 mL). The resulting mixture was stirred for 30 minutes at room temperature and then filtered. The volatile

components were removed from the filtrate by lyophilization to give  $[\text{ClTm}^{\text{Bu}^t}]\text{NiI}$  as yellow powder, which was washed with pentane ( $2 \times 0.5 \text{ mL}$ ) and dried *in vacuo* (0.018 g, 37%). Crystals of composition  $[\text{SCNTm}^{\text{Bu}^t}]\text{NiI} \cdot \text{C}_6\text{H}_6$  suitable for X-ray diffraction were grown by slow evaporation of a benzene solution. Anal. calcd. for  $\text{C}_{22}\text{H}_{33}\text{BIN}_7\text{NiS}_4$ : C, 36.7%; H, 4.6%; N, 13.6%. Found: C, 37.4%; H, 4.0%; N, 13.7%.  $^1\text{H NMR}$  ( $\text{C}_6\text{D}_6$ ): -4.96 [s, 3H, 3  $\text{CH}_{\text{mim}}^{\text{Bu}^t}$ ], 1.45 [s, 27H, 3  $\text{Bu}^t$ ], 10.40 [s, 3H, 3  $\text{CH}_{\text{mim}}^{\text{Bu}^t}$ ]. IR Data (KBr pellet,  $\text{cm}^{-1}$ ): 2978 (m), 2924 (w), 2088 (s), 1570 (w), 1481 (w), 1412 (m), 1357 (vs), 1298 (m), 1187 (s), 1169 (s), 1078 (m), 1032 (w), 821 (w), 806 (w), 773 (m), 730 (w), 686 (w). Mass spectrum:  $m/z = 592.5 \{[\text{M}-\text{I}]^+\}$ .

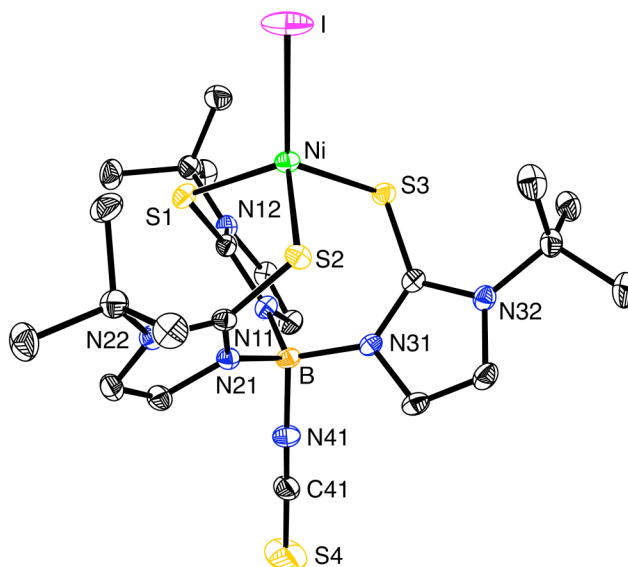

Molecular structure of  $[\text{SCNTm}^{\text{Bu}^t}]\text{NiI}$  (20% thermal parameters)

### Synthesis of $[\text{N}_3\text{Tm}^{\text{Bu}^t}]\text{NiI}$

A suspension of  $[\kappa^4\text{-B}(\text{mim}^{\text{Bu}^t})_3]\text{NiN}_3$  (0.040 g, 0.069 mmol) in benzene (0.5 mL) was treated with a solution of  $\text{I}_2$  (0.010 g, 0.039 mmol) in benzene (1 mL). The resulting mixture was stirred for 30 minutes at room temperature and then filtered. The volatile components were removed from the filtrate by lyophilization to give  $[\text{N}_3\text{Tm}^{\text{Bu}^t}]\text{NiI}$  as an orange powder, which was washed with pentane ( $2 \times 0.5 \text{ mL}$ ) and dried *in vacuo* (0.017 g, 35%). Crystals suitable for X-ray diffraction were grown by slow evaporation of a benzene solution.  $^1\text{H NMR}$  ( $\text{C}_6\text{D}_6$ ): -4.85 [s, 3H, 3  $\text{CH}_{\text{mim}}^{\text{Bu}^t}$ ], 1.45 [s, 27H, 3  $\text{Bu}^t$ ], 10.01

[s, 3H, 3 CH<sub>3</sub>mim<sup>But</sup>]. IR Data (KBr pellet, cm<sup>-1</sup>): 2976 (m), 2920 (m), 2851 (w), 2128 (vs), 1568 (w), 1481 (w), 1457 (w), 1413 (m), 1398 (w), 1367 (s), 1356 (vs), 1295 (m), 1261 (w), 1230 (w), 1187 (s), 1168 (s), 1077 (m), 1032 (w), 984 (w), 872 (w), 829 (m), 797 (m), 723 (w), 689 (w). Mass spectrum:  $m/z = 576.6$  {M-I}<sup>+</sup>.

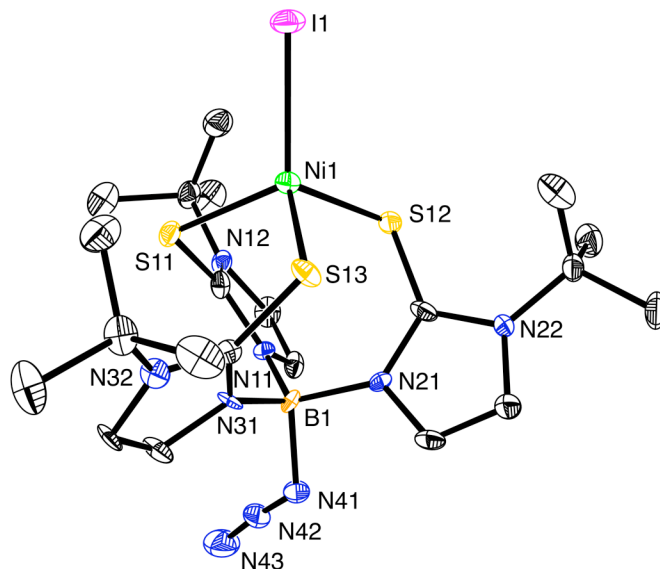

Molecular structure of [N<sub>3</sub>Tm<sup>But</sup>]NiI (20% thermal parameters)

### X-ray structure determinations

X-ray diffraction data were collected on either a Bruker Apex II diffractometer or a Bruker P4 diffractometer equipped with a SMART CCD detector and crystal data, data collection and refinement parameters are summarized in Table 1. The structures were solved using direct methods and standard difference map techniques, and were refined by full-matrix least-squares procedures on  $F^2$  with SHELXTL (Versions 5.10 and 6.1).<sup>6</sup>

### Computational Details

All calculations were carried out using DFT as implemented in the Jaguar 7.0 suite of *ab initio* quantum chemistry programs.<sup>7</sup> Geometry optimizations were performed with the B3LYP density functional<sup>8</sup> and LACVP\*\* basis sets, *i.e.* 6-31G\*\* (C, H, N, B, F, S and Cl) and LACVP (Ni) and LAV3P (Br and I) basis sets.<sup>9</sup> Cartesian coordinates for geometry optimized structures are listed in Table 2. The energies of the optimized structures

were reevaluated by additional single point calculations on each optimized geometry using cc-pVTZ(-f) correlation consistent triple- $\zeta$  (C, H, N, B, F, S and Cl), LACV3P (Ni) and LAV3P (Br and I) basis sets.

**Table 1.** Crystal, intensity collection and refinement data.

|                                         | $[\kappa^4\text{-B(mim}^{\text{Bu}^t})_3]\text{NiCl}$ | $[\kappa^4\text{-B(mim}^{\text{Bu}^t})_3]\text{NiN}_3 \cdot 2\text{CH}_3\text{CN}$ |
|-----------------------------------------|-------------------------------------------------------|------------------------------------------------------------------------------------|
| lattice                                 | rhombohedral                                          | monoclinic                                                                         |
| formula                                 | $\text{C}_{21}\text{H}_{33}\text{BClN}_6\text{NiS}_3$ | $\text{C}_{25}\text{H}_{39}\text{BN}_{11}\text{NiS}_3$                             |
| formula weight                          | 570.68                                                | 659.37                                                                             |
| space group                             | $R3c$                                                 | $P2_1/n$                                                                           |
| $a/\text{\AA}$                          | 15.8290(6)                                            | 14.081(2)                                                                          |
| $b/\text{\AA}$                          | 15.8290(6)                                            | 15.395(2)                                                                          |
| $c/\text{\AA}$                          | 18.450(1)                                             | 16.195(2)                                                                          |
| $\alpha/^\circ$                         | 90                                                    | 90                                                                                 |
| $\beta/^\circ$                          | 90                                                    | 108.294(3)                                                                         |
| $\gamma/^\circ$                         | 120                                                   | 90                                                                                 |
| $V/\text{\AA}^3$                        | 4003.3(4)                                             | 3333.3(7)                                                                          |
| $Z$                                     | 6                                                     | 4                                                                                  |
| temperature (K)                         | 243                                                   | 243                                                                                |
| radiation ( $\lambda$ , $\text{\AA}$ )  | 0.71073                                               | 0.71073                                                                            |
| $\rho$ (calcd.), $\text{g cm}^{-3}$     | 1.420                                                 | 1.314                                                                              |
| $\mu$ (Mo $K\alpha$ ), $\text{mm}^{-1}$ | 1.084                                                 | 0.804                                                                              |
| $\theta$ max, deg.                      | 28.28                                                 | 26.37                                                                              |
| no. of data                             | 1568                                                  | 6814                                                                               |
| no. of parameters                       | 101                                                   | 382                                                                                |
| $R_1$                                   | 0.0340                                                | 0.0561                                                                             |
| $wR_2$                                  | 0.0765                                                | 0.1559                                                                             |
| GOF                                     | 1.068                                                 | 1.013                                                                              |

|                                         | $[\kappa^4\text{-B(mim}^{\text{Bu}^t})_3]\text{NiNCS}$ | $[\kappa^4\text{-B(mim}^{\text{Bu}^t})_3]\text{NiOAc}\cdot\text{CH}_3\text{CN}$ |
|-----------------------------------------|--------------------------------------------------------|---------------------------------------------------------------------------------|
| lattice                                 | orthorhombic                                           | monoclinic                                                                      |
| formula                                 | $\text{C}_{22}\text{H}_{33}\text{BN}_7\text{NiS}_4$    | $\text{C}_{25}\text{H}_{39}\text{BN}_7\text{NiO}_2\text{S}_3$                   |
| formula weight                          | 593.31                                                 | 635.33                                                                          |
| space group                             | $Pna2_1$                                               | $P2_1/c$                                                                        |
| $a/\text{\AA}$                          | 14.582(2)                                              | 10.4645(4)                                                                      |
| $b/\text{\AA}$                          | 13.815(2)                                              | 14.1609(5)                                                                      |
| $c/\text{\AA}$                          | 15.049(2)                                              | 20.7525(7)                                                                      |
| $\alpha/^\circ$                         | 90                                                     | 90                                                                              |
| $\beta/^\circ$                          | 90                                                     | 91.7673(4)                                                                      |
| $\gamma/^\circ$                         | 90                                                     | 90                                                                              |
| $V/\text{\AA}^3$                        | 3031.4(7)                                              | 3073.8(2)                                                                       |
| $Z$                                     | 4                                                      | 4                                                                               |
| temperature (K)                         | 243                                                    | 115                                                                             |
| radiation ( $\lambda$ , $\text{\AA}$ )  | 0.71073                                                | 0.71073                                                                         |
| $\rho$ (calcd.), $\text{g cm}^{-3}$     | 1.300                                                  | 1.373                                                                           |
| $\mu$ (Mo $K\alpha$ ), $\text{mm}^{-1}$ | 0.939                                                  | 0.870                                                                           |
| $\theta$ max, deg.                      | 28.31                                                  | 28.22                                                                           |
| no. of data                             | 5421                                                   | 7181                                                                            |
| no. of parameters                       | 327                                                    | 348                                                                             |
| $R_1$                                   | 0.0741                                                 | 0.0448                                                                          |
| $wR_2$                                  | 0.1564                                                 | 0.1216                                                                          |
| GOF                                     | 1.046                                                  | 1.034                                                                           |

|                                          | [FTm <sup>Bu<sup>t</sup></sup> ]NiCl·<br>C <sub>6</sub> H <sub>6</sub> | [CITm <sup>Bu<sup>t</sup></sup> ]NiCl·<br>C <sub>6</sub> H <sub>6</sub>          |
|------------------------------------------|------------------------------------------------------------------------|----------------------------------------------------------------------------------|
| lattice                                  | hexagonal                                                              | hexagonal                                                                        |
| formula                                  | C <sub>27</sub> H <sub>39</sub> BClFN <sub>6</sub> NiS <sub>3</sub>    | C <sub>27</sub> H <sub>39</sub> BCl <sub>2</sub> N <sub>6</sub> NiS <sub>3</sub> |
| formula weight                           | 667.79                                                                 | 684.24                                                                           |
| space group                              | <i>P</i> 6 <sub>3</sub>                                                | <i>P</i> 6 <sub>3</sub>                                                          |
| <i>a</i> /Å                              | 11.3970(3)                                                             | 11.4569(3)                                                                       |
| <i>b</i> /Å                              | 11.3970(3)                                                             | 11.4569(3)                                                                       |
| <i>c</i> /Å                              | 14.7256(8)                                                             | 14.8181(8)                                                                       |
| $\alpha$ /°                              | 90                                                                     | 90                                                                               |
| $\beta$ /°                               | 90                                                                     | 90                                                                               |
| $\gamma$ /°                              | 120                                                                    | 120                                                                              |
| <i>V</i> /Å <sup>3</sup>                 | 1656.5(1)                                                              | 1684.5(1)                                                                        |
| <i>Z</i>                                 | 2                                                                      | 2                                                                                |
| temperature (K)                          | 125                                                                    | 115                                                                              |
| radiation ( $\lambda$ , Å)               | 0.71073                                                                | 0.71073                                                                          |
| $\rho$ (calcd.), g cm <sup>-3</sup>      | 1.339                                                                  | 1.349                                                                            |
| $\mu$ (Mo K $\alpha$ ), mm <sup>-1</sup> | 0.888                                                                  | 0.948                                                                            |
| $\theta$ max, deg.                       | 32.55                                                                  | 28.32                                                                            |
| no. of data                              | 3894                                                                   | 2683                                                                             |
| no. of parameters                        | 122                                                                    | 125                                                                              |
| <i>R</i> <sub>1</sub>                    | 0.0294                                                                 | 0.0519                                                                           |
| <i>wR</i> <sub>2</sub>                   | 0.0705                                                                 | 0.1353                                                                           |
| GOF                                      | 1.028                                                                  | 1.052                                                                            |



|                                          | [ClTm <sup>Bu<sup>t</sup></sup> ] <sup>Bu<sup>t</sup></sup> NiBr•<br>C <sub>6</sub> H <sub>6</sub> | [ClTm <sup>Bu<sup>t</sup></sup> ] <sup>Bu<sup>t</sup></sup> NiI     |
|------------------------------------------|----------------------------------------------------------------------------------------------------|---------------------------------------------------------------------|
| lattice                                  | hexagonal                                                                                          | monoclinic                                                          |
| formula                                  | C <sub>27</sub> H <sub>39</sub> BBrClIN <sub>6</sub> NiS <sub>3</sub>                              | C <sub>21</sub> H <sub>33</sub> BClIN <sub>6</sub> NiS <sub>3</sub> |
| formula weight                           | 728.70                                                                                             | 697.58                                                              |
| space group                              | <i>P</i> 6 <sub>3</sub>                                                                            | <i>P</i> 2 <sub>1</sub> / <i>c</i>                                  |
| <i>a</i> /Å                              | 11.5255(3)                                                                                         | 14.165(1)                                                           |
| <i>b</i> /Å                              | 11.5255(3)                                                                                         | 20.585(2)                                                           |
| <i>c</i> /Å                              | 15.193(1)                                                                                          | 20.539(2)                                                           |
| $\alpha$ /°                              | 90                                                                                                 | 90                                                                  |
| $\beta$ /°                               | 90                                                                                                 | 92.282(2)                                                           |
| $\gamma$ /°                              | 120                                                                                                | 90                                                                  |
| <i>V</i> /Å <sup>3</sup>                 | 1747.8(1)                                                                                          | 5984(1)                                                             |
| <i>Z</i>                                 | 2                                                                                                  | 8                                                                   |
| temperature (K)                          | 243                                                                                                | 243                                                                 |
| radiation ( $\lambda$ , Å)               | 0.71073                                                                                            | 0.71073                                                             |
| $\rho$ (calcd.), g cm <sup>-3</sup>      | 1.385                                                                                              | 1.549                                                               |
| $\mu$ (Mo K $\alpha$ ), mm <sup>-1</sup> | 1.980                                                                                              | 2.000                                                               |
| $\theta$ max, deg.                       | 28.29                                                                                              | 28.36                                                               |
| no. of data                              | 2791                                                                                               | 13803                                                               |
| no. of parameters                        | 111                                                                                                | 614                                                                 |
| <i>R</i> <sub>1</sub>                    | 0.0572                                                                                             | 0.0692                                                              |
| <i>wR</i> <sub>2</sub>                   | 0.1611                                                                                             | 0.1858                                                              |
| GOF                                      | 1.046                                                                                              | 1.011                                                               |

|                                          | [SCNTm <sup>Bu<sup>t</sup></sup> ]NiI·<br>C <sub>6</sub> H <sub>6</sub> | [N <sub>3</sub> Tm <sup>Bu<sup>t</sup></sup> ]NiI                |
|------------------------------------------|-------------------------------------------------------------------------|------------------------------------------------------------------|
| lattice                                  | triclinic                                                               | monoclinic                                                       |
| formula                                  | C <sub>28</sub> H <sub>39</sub> BN <sub>7</sub> NiS <sub>4</sub>        | C <sub>21</sub> H <sub>33</sub> BN <sub>9</sub> NiS <sub>3</sub> |
| formula weight                           | 798.32                                                                  | 704.16                                                           |
| space group                              | <i>P</i> -1                                                             | <i>P</i> 2 <sub>1</sub> / <i>c</i>                               |
| <i>a</i> /Å                              | 10.5227(4)                                                              | 14.042(1)                                                        |
| <i>b</i> /Å                              | 11.0009(5)                                                              | 20.687(1)                                                        |
| <i>c</i> /Å                              | 16.8869(7)                                                              | 21.084(1)                                                        |
| $\alpha$ /°                              | 77.080(1)                                                               | 90                                                               |
| $\beta$ /°                               | 89.159(1)                                                               | 92.870(2)                                                        |
| $\gamma$ /°                              | 70.941(1)                                                               | 90                                                               |
| <i>V</i> /Å <sup>3</sup>                 | 1797.3(1)                                                               | 6116.9(8)                                                        |
| <i>Z</i>                                 | 2                                                                       | 8                                                                |
| temperature (K)                          | 243                                                                     | 243                                                              |
| radiation ( $\lambda$ , Å)               | 0.71073                                                                 | 0.71073                                                          |
| $\rho$ (calcd.), g cm <sup>-3</sup>      | 1.475                                                                   | 1.529                                                            |
| $\mu$ (Mo K $\alpha$ ), mm <sup>-1</sup> | 1.660                                                                   | 1.876                                                            |
| $\theta$ max, deg.                       | 28.31                                                                   | 24.18                                                            |
| no. of data                              | 8122                                                                    | 9775                                                             |
| no. of parameters                        | 379                                                                     | 650                                                              |
| <i>R</i> <sub>1</sub>                    | 0.0557                                                                  | 0.0628                                                           |
| <i>wR</i> <sub>2</sub>                   | 0.1451                                                                  | 0.0974                                                           |
| GOF                                      | 1.035                                                                   | 1.004                                                            |

**Table 2.** Cartesian Coordinated for Geometry Optimized Structures (energies in parentheses are for the higher basis set)

| <b>FTmNiCl</b>                      |               |               |               |
|-------------------------------------|---------------|---------------|---------------|
| <b>-2743.87644399768 Hartrees</b>   |               |               |               |
| <b>(-2744.31487778504 Hartrees)</b> |               |               |               |
| <b>atom</b>                         | <b>x</b>      | <b>y</b>      | <b>z</b>      |
| Ni                                  | 0.0000000000  | 0.0000000000  | 1.8904189756  |
| S                                   | -1.7540053093 | -1.2518366490 | 0.8307794547  |
| Cl                                  | 0.0000000000  | 0.0000000000  | 4.1366351441  |
| F                                   | 0.0000000000  | 0.0000000000  | -3.3663623957 |
| B                                   | 0.0000000000  | 0.0000000000  | -1.9668190840 |
| N                                   | -1.4783414297 | 0.2279615436  | -1.5342004970 |
| N                                   | -3.4481658556 | 0.3292069144  | -0.5846107985 |
| C                                   | -2.2019514761 | -0.2080663430 | -0.4676161104 |
| C                                   | -2.2910508285 | 1.0447929358  | -2.3116793175 |
| H                                   | -1.9230212345 | 1.4947879529  | -3.2179076704 |
| C                                   | -3.5119177040 | 1.1073242226  | -1.7291358730 |
| H                                   | -4.4124027402 | 1.6243463498  | -2.0188942937 |
| C                                   | -4.5321367059 | 0.1391940892  | 0.3709252496  |
| H                                   | -4.1400184552 | 0.2325296192  | 1.3845564228  |
| H                                   | -5.2871972455 | 0.9054117983  | 0.1895901667  |
| H                                   | -4.9806597692 | -0.8515018459 | 0.2586153314  |
| S                                   | 1.9611249941  | -0.8930948317 | 0.8307794547  |
| N                                   | 0.5417502270  | -1.3942620054 | -1.5342004970 |

|   |               |               |               |
|---|---------------|---------------|---------------|
| N | 1.4389813769  | -3.1508026846 | -0.5846107985 |
| C | 1.2811664767  | -1.8029127447 | -0.4676161104 |
| C | 0.2407081901  | -2.5065046868 | -2.3116793175 |
| H | -0.3330137233 | -2.4127792175 | -3.2179076704 |
| C | 0.7969879450  | -3.5950720590 | -1.7291358730 |
| H | 0.7994761667  | -4.6334260396 | -2.0188942937 |
| C | 2.1455227356  | -3.9945425653 | 0.3709252496  |
| H | 1.8686326702  | -3.7016259640 | 1.3845564228  |
| H | 1.8594890045  | -5.0315530286 | 0.1895901667  |
| H | 3.2277521145  | -3.8876269648 | 0.2586153314  |
| S | -0.2071196848 | 2.1449314807  | 0.8307794547  |
| N | 0.9365912027  | 1.1663004618  | -1.5342004970 |
| N | 2.0091844788  | 2.8215957702  | -0.5846107985 |
| C | 0.9207849994  | 2.0109790877  | -0.4676161104 |
| C | 2.0503426384  | 1.4617117509  | -2.3116793175 |
| H | 2.2560349577  | 0.9179912646  | -3.2179076704 |
| C | 2.7149297590  | 2.4877478364  | -1.7291358730 |
| H | 3.6129265735  | 3.0090796899  | -2.0188942937 |
| C | 2.3866139703  | 3.8553484761  | 0.3709252496  |
| H | 2.2713857850  | 3.4690963448  | 1.3845564228  |
| H | 3.4277082410  | 4.1261412303  | 0.1895901667  |
| H | 1.7529076547  | 4.7391288107  | 0.2586153314  |

**CITmNiF**  
**-2743.81853746678 Hartrees**  
**(-2744.26958648035 Hartrees)**

| <b>atom</b> | <b>x</b>      | <b>y</b>      | <b>z</b>      |
|-------------|---------------|---------------|---------------|
| Ni          | 0.0000000036  | 0.0000000012  | 1.9067271993  |
| S           | -1.7016923913 | -1.3183297752 | 0.7663729476  |
| F           | -0.0000000038 | -0.0000000024 | 3.7013520617  |
| Cl          | -0.0000000044 | -0.0000000047 | -3.9090305897 |
| B           | 0.0000000047  | 0.0000000059  | -1.9901329604 |
| N           | -1.4700956199 | 0.2466315079  | -1.5612208921 |
| N           | -3.4102879926 | 0.3250046011  | -0.5427034205 |
| C           | -2.1723963347 | -0.2381279954 | -0.4925431751 |
| C           | -2.2889698612 | 1.1393161810  | -2.2481563129 |
| H           | -1.9457802318 | 1.6473949659  | -3.1323235444 |
| C           | -3.4887351688 | 1.1831957293  | -1.6261501696 |
| H           | -4.3854533566 | 1.7358637104  | -1.8555334796 |
| C           | -4.4708067518 | 0.0959645650  | 0.4297815188  |
| H           | -4.0605968431 | 0.1674966506  | 1.4381873854  |
| H           | -5.2389499055 | 0.8565488383  | 0.2824755362  |
| H           | -4.9080572591 | -0.8973117315 | 0.2991997570  |
| S           | 1.9922134708  | -0.8125560925 | 0.7695055417  |
| N           | 0.5233375679  | -1.3967048613 | -1.5602454329 |
| N           | 1.4263153464  | -3.1145554419 | -0.5395501595 |
| C           | 1.2931440537  | -1.7611095193 | -0.4901464550 |
| C           | 0.1627758428  | -2.5530725592 | -2.2474358388 |

|   |               |               |               |
|---|---------------|---------------|---------------|
| H | -0.4473861519 | -2.5109816384 | -3.1326902516 |
| C | 0.7252413332  | -3.6131015473 | -1.6241127772 |
| H | 0.6971938057  | -4.6661239283 | -1.8532532007 |
| C | 2.1547293794  | -3.9172728440 | 0.4341379661  |
| H | 1.8859912633  | -3.5978209520 | 1.4421007836  |
| H | 1.8816089904  | -4.9631819667 | 0.2867977908  |
| H | 3.2335560222  | -3.7979754585 | 0.3048734740  |
| S | -0.2923683929 | 2.1324973876  | 0.7704758338  |
| N | 0.9473547331  | 1.1509057525  | -1.5593556223 |
| N | 1.9827979342  | 2.7933662847  | -0.5403021513 |
| C | 0.8777145819  | 2.0007223675  | -0.4898270245 |
| C | 2.1292157198  | 1.4165821518  | -2.2464708050 |
| H | 2.3981819706  | 0.8663094205  | -3.1310703203 |
| C | 2.7651793340  | 2.4348589010  | -1.6244940933 |
| H | 3.6907525683  | 2.9375372834  | -1.8542482013 |
| C | 2.3133935042  | 3.8267781682  | 0.4322006218  |
| H | 2.1712317506  | 3.4353861679  | 1.4405858968  |
| H | 3.3556355345  | 4.1133926695  | 0.2844978027  |
| H | 1.6703443843  | 4.7010304435  | 0.3019283441  |

**BrTmNiCl**  
**-2657.16793734626 Hartrees**  
**(-2657.57721243469 Hartrees)**

| <b>atom</b> | <b>x</b>      | <b>y</b>      | <b>z</b>      |
|-------------|---------------|---------------|---------------|
| Ni          | -0.0000000004 | -0.0000000001 | 2.3439103774  |
| S           | -1.6670964560 | -1.3637870274 | 1.2482262526  |
| Cl          | 0.0000000002  | 0.0000000001  | 4.5829299985  |
| Br          | -0.0000000002 | 0.0000000000  | -3.6448134556 |
| B           | 0.0000000003  | 0.0000000001  | -1.4715765327 |
| N           | -1.4697843200 | 0.2288141699  | -1.0629944274 |
| N           | -3.3946469162 | 0.3057585671  | -0.0118492958 |
| C           | -2.1623434883 | -0.2688769781 | 0.0088388165  |
| C           | -2.2900650105 | 1.1454006424  | -1.7175155366 |
| H           | -1.9549999623 | 1.6666131887  | -2.5970874718 |
| C           | -3.4797185021 | 1.1859560109  | -1.0772831542 |
| H           | -4.3745636100 | 1.7511408067  | -1.2819995143 |
| C           | -4.4502552071 | 0.0752388147  | 0.9672451971  |
| H           | -3.9955110271 | -0.1042305187 | 1.9417293568  |
| H           | -5.0851865169 | 0.9617669386  | 1.0066763275  |
| H           | -5.0522759907 | -0.7953711810 | 0.6912538220  |
| S           | 2.0137517809  | -0.7613636608 | 1.2462949520  |
| N           | 0.5375726922  | -1.3878547297 | -1.0642910797 |
| N           | 1.4350357281  | -3.0930920549 | -0.0142949562 |
| C           | 1.3146631655  | -1.7387388121 | 0.0074379754  |

|   |               |               |               |
|---|---------------|---------------|---------------|
| C | 0.1557885365  | -2.5564378377 | -1.7201775842 |
| H | -0.4629665357 | -2.5267416856 | -2.5998348277 |
| C | 0.7167074928  | -3.6068027326 | -1.0807716044 |
| H | 0.6763931915  | -4.6642214424 | -1.2864908537 |
| C | 2.1637790730  | -3.8927372076 | 0.9631872348  |
| H | 2.1069668958  | -3.4007401512 | 1.9343854160  |
| H | 1.7031791317  | -4.8806006033 | 1.0152628918  |
| H | 3.2148213161  | -3.9925753841 | 0.6768104716  |
| S | -0.3484536774 | 2.1238963271  | 1.2479659389  |
| N | 0.9325701613  | 1.1592228413  | -1.0635113858 |
| N | 1.9611177842  | 2.7875665122  | -0.0114861379 |
| C | 0.8479064303  | 2.0067792014  | 0.0090866512  |
| C | 2.1355640657  | 1.4132863338  | -1.7189404034 |
| H | 2.4190952537  | 0.8635810598  | -2.5992665204 |
| C | 2.7650803158  | 2.4232150447  | -1.0782321813 |
| H | 3.7011960982  | 2.9169172121  | -1.2832862609 |
| C | 2.2899671656  | 3.8171793433  | 0.9671727321  |
| H | 1.8879888001  | 3.5231798578  | 1.9369417667  |
| H | 3.3759549414  | 3.9082754848  | 1.0229462648  |
| H | 1.8553280473  | 4.7789623005  | 0.6795094625  |



**ClTmNiBr**  
**-2657.18379752059 Hartrees**  
**(-2657.58917118896 Hartrees)**

| <b>atom</b> | <b>x</b>      | <b>y</b>      | <b>z</b>      |
|-------------|---------------|---------------|---------------|
| Ni          | 0.0000000014  | 0.0000000022  | 2.3522718957  |
| S           | -1.6860818935 | -1.3322696995 | 1.2590924145  |
| Br          | -0.0000000010 | -0.0000000005 | 4.7709839800  |
| Cl          | -0.0000000005 | 0.0000000028  | -3.4212078677 |
| B           | 0.0000000001  | -0.0000000045 | -1.5072986690 |
| N           | -1.4706070219 | 0.2371376019  | -1.0714436069 |
| N           | -3.3959474604 | 0.3250910413  | -0.0250007465 |
| C           | -2.1618058653 | -0.2449893756 | 0.0048934700  |
| C           | -2.2939478032 | 1.1359659393  | -1.7447608244 |
| H           | -1.9604449207 | 1.6437736691  | -2.6328546006 |
| C           | -3.4844232926 | 1.1863411035  | -1.1045994050 |
| H           | -4.3805976192 | 1.7456749181  | -1.3193447297 |
| C           | -4.4361577419 | 0.1116661296  | 0.9746486773  |
| H           | -4.0302050267 | 0.2908514052  | 1.9718264646  |
| H           | -5.2501776730 | 0.8088897428  | 0.7716326231  |
| H           | -4.8100741705 | -0.9135767826 | 0.9279185861  |
| S           | 1.9951032600  | -0.7970906326 | 1.2579110160  |
| N           | 0.5311563019  | -1.3930166565 | -1.0742579946 |
| N           | 1.4258503612  | -3.1042749289 | -0.0347998812 |
| C           | 1.2957103771  | -1.7511237177 | 0.0006269047  |

|   |               |               |               |
|---|---------------|---------------|---------------|
| C | 0.1701209435  | -2.5544359084 | -1.7524673503 |
| H | -0.4365146881 | -2.5187160958 | -2.6404316004 |
| C | 0.7266866687  | -3.6105561589 | -1.1165754717 |
| H | 0.6953557829  | -4.6656554778 | -1.3353233239 |
| C | 2.1349300602  | -3.8990358482 | 0.9613226603  |
| H | 1.7774775457  | -3.6411850212 | 1.9598395999  |
| H | 1.9413251117  | -4.9526600657 | 0.7555126470  |
| H | 3.2091229972  | -3.7066109737 | 0.9135576682  |
| S | -0.3093114231 | 2.1253218513  | 1.2602028507  |
| N | 0.9405018707  | 1.1557942653  | -1.0721528926 |
| N | 1.9779823938  | 2.7807423118  | -0.0270128577 |
| C | 0.8686737984  | 1.9948766504  | 0.0045179015  |
| C | 2.1285571138  | 1.4219281930  | -1.7477620130 |
| H | 2.4004845284  | 0.8797827044  | -2.6365607715 |
| C | 2.7666344125  | 2.4288318807  | -1.1084623488 |
| H | 3.6978841798  | 2.9270454076  | -1.3244727268 |
| C | 2.3127838266  | 3.7894596869  | 0.9716069837  |
| H | 2.2669693026  | 3.3488296440  | 1.9691230834  |
| H | 3.3227420937  | 4.1474094717  | 0.7671232974  |
| H | 1.6103806847  | 4.6247018122  | 0.9253082599  |

**ITmNiCl**  
**-2655.37540490418 Hartrees**  
**(-2655.78355641257 Hartrees)**

| <b>atom</b> | <b>x</b>      | <b>y</b>      | <b>z</b>      |
|-------------|---------------|---------------|---------------|
| Ni          | 0.0000000000  | 0.0000000000  | 2.6969781577  |
| S           | -1.6567010280 | -1.3740963140 | 1.5905184486  |
| Cl          | 0.0000000000  | 0.0000000000  | 4.9364811414  |
| I           | 0.0000000000  | 0.0000000000  | -3.5484162705 |
| B           | 0.0000000000  | 0.0000000000  | -1.1243614696 |
| N           | -1.4657619717 | 0.2334537140  | -0.7173619147 |
| N           | -3.3754535780 | 0.3118098866  | 0.3628748682  |
| C           | -2.1497009842 | -0.2732753282 | 0.3572478736  |
| C           | -2.2845711334 | 1.1736477402  | -1.3398433885 |
| H           | -1.9588173698 | 1.7092582770  | -2.2142820164 |
| C           | -3.4644012337 | 1.2158643122  | -0.6814628552 |
| H           | -4.3555002522 | 1.7941537310  | -0.8643513426 |
| C           | -4.3968045887 | 0.0923153086  | 1.3812886410  |
| H           | -3.9819494821 | 0.2971836020  | 2.3702952970  |
| H           | -5.2288558150 | 0.7676889395  | 1.1778464173  |
| H           | -4.7472695723 | -0.9414762040 | 1.3561746309  |
| S           | 2.0193251637  | -0.7457089214 | 1.5956654744  |
| N           | 0.5322383339  | -1.3851421768 | -0.7150570807 |
| N           | 1.4207009018  | -3.0767375984 | 0.3667882834  |
| C           | 1.3128547861  | -1.7227549854 | 0.3607591035  |

|   |               |               |               |
|---|---------------|---------------|---------------|
| C | 0.1297573577  | -2.5652407737 | -1.3371234012 |
| H | -0.4961346114 | -2.5523375055 | -2.2121971266 |
| C | 0.6840395225  | -3.6071637736 | -0.6778849222 |
| H | 0.6305395481  | -4.6681762558 | -0.8604358213 |
| C | 2.1216513950  | -3.8503835904 | 1.3859959369  |
| H | 1.7357626353  | -3.5936678577 | 2.3746215417  |
| H | 1.9541428376  | -4.9088984746 | 1.1827058814  |
| H | 3.1919238588  | -3.6357305910 | 1.3615782681  |
| S | -0.3616610427 | 2.1219844494  | 1.5953436515  |
| N | 0.9341092641  | 1.1534988696  | -0.7157045004 |
| N | 1.9561418684  | 2.7680098297  | 0.3658370712  |
| C | 0.8370715969  | 1.9982675454  | 0.3601854823  |
| C | 2.1573498931  | 1.3941125387  | -1.3380965663 |
| H | 2.4585317103  | 0.8452429743  | -2.2131489542 |
| C | 2.7832602986  | 2.3948389018  | -0.6791283948 |
| H | 3.7290521226  | 2.8785410301  | -0.8620255332 |
| C | 2.2764768346  | 3.7616395784  | 1.3850269323  |
| H | 2.2472559497  | 3.2989721999  | 2.3735975013  |
| H | 3.2770059618  | 4.1454659045  | 1.1814146842  |
| H | 1.5557604274  | 4.5814699875  | 1.3609891312  |

**CITmNiI**  
**-2655.40192077623 Hartrees**  
**(-2655.80693194184 Hartrees)**

| <b>atom</b> | <b>x</b>      | <b>y</b>      | <b>z</b>      |
|-------------|---------------|---------------|---------------|
| Ni          | 0.0000000017  | 0.0000000026  | 2.7092580964  |
| S           | -1.6799568193 | -1.3340535949 | 1.6160409039  |
| I           | -0.0000000013 | -0.0000000013 | 5.3012968836  |
| Cl          | -0.0000000011 | 0.0000000007  | -3.0685082290 |
| B           | 0.0000000008  | -0.0000000019 | -1.1555738221 |
| N           | -1.4719634510 | 0.2316576214  | -0.7189239450 |
| N           | -3.3922955210 | 0.3230936950  | 0.3360423179  |
| C           | -2.1587731753 | -0.2484999519 | 0.3610696926  |
| C           | -2.2964326547 | 1.1316088767  | -1.3887899861 |
| H           | -1.9665435134 | 1.6365884826  | -2.2799294891 |
| C           | -3.4837047217 | 1.1851461243  | -0.7426643173 |
| H           | -4.3803206478 | 1.7448955163  | -0.9545001273 |
| C           | -4.4250512906 | 0.1186792383  | 1.3455290661  |
| H           | -4.0263511291 | 0.3524120618  | 2.3345904400  |
| H           | -5.2609484358 | 0.7802490081  | 1.1139208291  |
| H           | -4.7651920365 | -0.9189322460 | 1.3415342589  |
| S           | 1.9950461766  | -0.7887724579 | 1.6141521601  |
| N           | 0.5345207097  | -1.3904706728 | -0.7196537795 |
| N           | 1.4176635824  | -3.0997331717 | 0.3327552916  |
| C           | 1.2947949970  | -1.7458484500 | 0.3593225563  |

|   |               |               |               |
|---|---------------|---------------|---------------|
| C | 0.1683551327  | -2.5540880074 | -1.3910498613 |
| H | -0.4342081625 | -2.5203344259 | -2.2819575338 |
| C | 0.7168177387  | -3.6092673614 | -0.7464059948 |
| H | 0.6813249344  | -4.6654247433 | -0.9594195745 |
| C | 2.1125895440  | -3.8922824197 | 1.3408283711  |
| H | 1.7115026868  | -3.6652135710 | 2.3304906575  |
| H | 1.9582933761  | -4.9468849337 | 1.1083377804  |
| H | 3.1810901994  | -3.6671602698 | 1.3361111069  |
| S | -0.3175985331 | 2.1208891553  | 1.6162662623  |
| N | 0.9352182077  | 1.1592288694  | -0.7187830489 |
| N | 1.9717414863  | 2.7792538937  | 0.3349523080  |
| C | 0.8616963596  | 1.9944323699  | 0.3610053659  |
| C | 2.1259184411  | 1.4257210881  | -1.3895868642 |
| H | 2.3988490497  | 0.8878318946  | -2.2807342958 |
| C | 2.7640957120  | 2.4287001062  | -0.7441985505 |
| H | 3.6958431091  | 2.9274690936  | -0.9567959931 |
| C | 2.3095096632  | 3.7769007373  | 1.3439148215  |
| H | 2.3147126032  | 3.3149798702  | 2.3330876205  |
| H | 3.2991640648  | 4.1725081461  | 1.1112852584  |
| H | 1.5789151959  | 4.5884277228  | 1.3404536530  |

**ITmNiNCS**  
**-2686.20142772115 Hartrees**  
**(-2686.63664906656 Hartrees)**

| <b>atom</b> | <b>x</b>      | <b>y</b>      | <b>z</b>      |
|-------------|---------------|---------------|---------------|
| Ni          | -0.1760734516 | -0.1299257870 | 2.6975532459  |
| S           | -1.8249642414 | -1.4528332226 | 1.5169437523  |
| N           | 0.2574140424  | 0.1926180130  | 4.5411038455  |
| C           | 0.7254446684  | 0.5465925139  | 5.5792742497  |
| S           | 1.3365257785  | 1.0056252099  | 6.9972817555  |
| I           | 0.0923238840  | 0.0474310220  | -3.5140897304 |
| B           | -0.0462408426 | -0.0293108333 | -1.0950188922 |
| N           | -1.5336625834 | 0.1897879287  | -0.7566284100 |
| N           | -3.4985801816 | 0.2307915079  | 0.2230438416  |
| C           | -2.2664497905 | -0.3366634168 | 0.2758282754  |
| C           | -2.3329617192 | 1.1259545284  | -1.4112162351 |
| H           | -1.9692911003 | 1.6764850390  | -2.2609466439 |
| C           | -3.5455758883 | 1.1457146213  | -0.8151236526 |
| H           | -4.4336712349 | 1.7147013283  | -1.0375255524 |
| C           | -4.5727476746 | -0.0220144128 | 1.1765270795  |
| H           | -4.2336393516 | 0.2104871513  | 2.1882548163  |
| H           | -5.4179992527 | 0.6147265143  | 0.9122335594  |
| H           | -4.8762354747 | -1.0701883083 | 1.1414126304  |
| S           | 1.8630796323  | -0.8899725734 | 1.6773287208  |
| N           | 0.4606069610  | -1.4326687957 | -0.7092064345 |

|   |               |               |               |
|---|---------------|---------------|---------------|
| N | 1.3225580936  | -3.1674030570 | 0.3245591942  |
| C | 1.2073651464  | -1.8146270824 | 0.3748093495  |
| C | 0.0788476054  | -2.5858695015 | -1.3917566091 |
| H | -0.5208135182 | -2.5367783919 | -2.2837399954 |
| C | 0.6190419857  | -3.6540395220 | -0.7633027451 |
| H | 0.5768573693  | -4.7060702576 | -0.9944178015 |
| C | 2.0079897791  | -3.9828995666 | 1.3211469126  |
| H | 1.5991577083  | -3.7773546034 | 2.3124743779  |
| H | 1.8551026192  | -5.0319431593 | 1.0644680579  |
| H | 3.0765754770  | -3.7586984287 | 1.3308576904  |
| S | -0.5615296738 | 2.0290584230  | 1.6447177162  |
| N | 0.8690592053  | 1.1034308155  | -0.6003765226 |
| N | 1.8453921539  | 2.6672543663  | 0.5931327994  |
| C | 0.7162671175  | 1.9197357495  | 0.4917667361  |
| C | 2.1335677384  | 1.3397293731  | -1.1354198474 |
| H | 2.4826133825  | 0.8107529509  | -2.0050304921 |
| C | 2.7315787291  | 2.3095033304  | -0.4071231494 |
| H | 3.6955083563  | 2.7801342506  | -0.5137225444 |
| C | 2.1168786360  | 3.6215543043  | 1.6643010630  |
| H | 2.0143491723  | 3.1277271983  | 2.6325867938  |
| H | 3.1358258374  | 3.9900101443  | 1.5391872366  |
| H | 1.4149444856  | 4.4565436367  | 1.6197814169  |



**SCNTmNiI**  
**-2686.24649431386 Hartrees**  
**(-2686.67601718693 Hartrees)**

| <b>atom</b> | <b>x</b>     | <b>y</b>      | <b>z</b>      |
|-------------|--------------|---------------|---------------|
| I           | 0.0277377839 | -2.2468524347 | 5.7177066203  |
| Ni          | 1.6499165626 | -0.4007743467 | 4.9022930615  |
| S           | 3.3551619968 | -0.9644807350 | 3.2998281447  |
| S           | 2.9495787766 | 0.7113522004  | 6.5866732158  |
| S           | 0.5793688449 | 1.4497042838  | 3.8023502765  |
| S           | 6.4875097733 | 5.7051401687  | 2.4429079267  |
| N           | 3.5070097073 | 1.7057589810  | 2.4289001754  |
| N           | 2.8495688282 | 0.2482826397  | 0.9304865493  |
| N           | 4.8043413775 | 1.6016109148  | 4.6678516754  |
| N           | 5.5905419390 | 0.2476051229  | 6.2009178373  |
| N           | 2.7335145534 | 3.1413139158  | 4.4426830577  |
| N           | 0.8059250508 | 3.6654913933  | 5.3435941741  |
| N           | 4.8353705665 | 3.6132685806  | 3.2444770550  |
| B           | 3.9452534435 | 2.4852470682  | 3.7086323624  |
| C           | 3.2499605993 | 0.3811553471  | 2.2245975407  |
| C           | 3.2396133277 | 2.3875793074  | 1.2457283263  |
| H           | 3.3662627486 | 3.4540723870  | 1.1682965348  |
| C           | 2.8383530949 | 1.4887487175  | 0.3170596874  |
| H           | 2.5535497452 | 1.6150877548  | -0.7150089156 |
| C           | 2.4438199309 | -1.0063427953 | 0.3073612803  |
| H           | 1.7429016925 | -1.5275937198 | 0.9611499591  |

|   |               |               |               |
|---|---------------|---------------|---------------|
| H | 1.9652461993  | -0.7745135193 | -0.6451088874 |
| H | 3.3097997733  | -1.6505439086 | 0.1362390615  |
| C | 4.4641722818  | 0.8835782421  | 5.7772262020  |
| C | 6.1527773454  | 1.3814399641  | 4.4046169690  |
| H | 6.6471639334  | 1.8440550290  | 3.5673346427  |
| C | 6.6420888434  | 0.5497565155  | 5.3535475892  |
| H | 7.6327597122  | 0.1525952093  | 5.5053617312  |
| C | 5.6575151925  | -0.6585489490 | 7.3417822981  |
| H | 4.8391079418  | -1.3779011646 | 7.2843201641  |
| H | 6.6157394551  | -1.1787575372 | 7.3077220052  |
| H | 5.5728308564  | -0.1052513681 | 8.2802235782  |
| C | 1.4226043793  | 2.7708665547  | 4.5238571206  |
| C | 2.9169464056  | 4.2663666466  | 5.2405712724  |
| H | 3.8796533281  | 4.7386991514  | 5.3383554247  |
| C | 1.7262582781  | 4.5955432654  | 5.7935571745  |
| H | 1.4507822483  | 5.4002885717  | 6.4559231663  |
| C | -0.5996763710 | 3.6106063507  | 5.7294271830  |
| H | -0.8527375481 | 2.5949752779  | 6.0375441887  |
| H | -0.7526715150 | 4.3025499353  | 6.5587360978  |
| H | -1.2416149156 | 3.8932812031  | 4.8915120074  |
| C | 5.5403391972  | 4.5061733792  | 2.9036026649  |

**Table 3.** “Snap” bond enthalpies for [YTm<sup>Me</sup>]NiZ determined by DFT calculations on [YTm<sup>Me</sup>]NiZ (*S* = 1), [YTm<sup>Me</sup>]Ni (*S* = 1/2), [B(mim<sup>Me</sup>)<sub>3</sub>]NiZ (*S* = 3/2) performed with the B3LYP functional and cc-pVTZ(-f)/LACV3P/LAV3P basis sets.

| [YTm <sup>Me</sup> ]NiZ   | <i>D</i> (B–Y)/kcal mol <sup>-1</sup> | <i>D</i> (Ni–Z)/kcal mol <sup>-1</sup> |
|---------------------------|---------------------------------------|----------------------------------------|
| [FTm <sup>Me</sup> ]NiCl  | 160.8 (Y = F)                         | 76.5 (Z = Cl)                          |
| [ClTm <sup>Me</sup> ]NiF  | 108.8 (Y = Cl)                        | 102.5 (Z = F)                          |
| [ClTm <sup>Me</sup> ]NiBr | 112.8 (Y = Cl)                        | 70.6 (Z = Br)                          |
| [ClTm <sup>Me</sup> ]NiI  | 108.1 (Y = Cl)                        | 61.6 (Z = I)                           |
| [BrTm <sup>Me</sup> ]NiCl | 93.0 (Y = Br)                         | 83.0 (Z = Cl)                          |
| [ITm <sup>Me</sup> ]NiCl  | 76.6 (Y = I)                          | 82.9 (Z = Cl)                          |

## References

- (1) (a) McNally, J. P.; Leong, V. S.; Cooper, N. J. in *Experimental Organometallic Chemistry*, Wayda, A. L.; Darensbourg, M. Y., Eds.; American Chemical Society: Washington, DC, 1987; Chapter 2, pp 6-23.  
(b) Burger, B.J.; Bercaw, J. E. in *Experimental Organometallic Chemistry*; Wayda, A. L.; Darensbourg, M. Y., Eds.; American Chemical Society: Washington, DC, 1987; Chapter 4, pp 79-98.  
(c) Shriver, D. F.; Drezdson, M. A.; *The Manipulation of Air-Sensitive Compounds*, 2<sup>nd</sup> Edition; Wiley-Interscience: New York, 1986.
- (2) Gottlieb, H. E.; Kotlyar, V.; Nudelman, A. J. *Org. Chem.* **1997**, *62*, 7512-7515.
- (3) Claude H. Dungan and John R. Van Wazer, "Compilation of reported F NMR chemical shifts, 1951 to mid-1967", New York, Wiley-Interscience (1970).
- (4) Smith, W. L. *J. Chem. Educ.* **1977**, *54*, 469-473.
- (5) (a) Tesmer, M.; Shu, M.; Vahrenkamp, H. *Inorg. Chem.* **2001**, *40*, 4022-4029.  
(b) Singh, A. K.; Mehtab, S.; Singh, U. P.; Aggarwal, V. *Anal. Bioanal. Chem.* **2007**, *388*, 1867-1876.
- (6) Sheldrick, G. M. SHELXTL, An Integrated System for Solving, Refining and Displaying Crystal Structures from Diffraction Data; University of Göttingen, Göttingen, Federal Republic of Germany, 1981.
- (7) Jaguar 6.5, Schrödinger, LLC, Portland, Oregon.
- (8) (a) Becke, A. D. *J. Chem. Phys.* **1993**, *98*, 5648-5652.  
(b) Becke, A. D. *Phys. Rev. A* **1988**, *38*, 3098-3100.  
(c) Lee, C. T.; Yang, W. T.; Parr, R. G. *Phys. Rev. B* **1988**, *37*, 785-789.  
(d) Vosko, S. H.; Wilk, L.; Nusair, M. *Can. J. Phys.* **1980**, *58*, 1200-1211.  
(e) Slater, J. C. *Quantum Theory of Molecules and Solids, Vol. 4: The Self-Consistent Field for Molecules and Solids*; McGraw-Hill: New York, 1974.
- (9) (a) Hay, P. J.; Wadt, W. R. *J. Chem. Phys.* **1985**, *82*, 270-283.

(b) Wadt, W. R.; Hay, P. J. *J. Chem. Phys.* **1985**, *82*, 284-298.

(c) Hay, P. J.; Wadt, W. R. *J. Chem. Phys.* **1985**, *82*, 299-310.
